# Supplementary material for: Gene Losses and Homology of the Chloroplast Genomes of Taxillus and Phacellaria Species
Source: MDPI journal article supplement (doi:10.3390/genes14040943), 2023-04-19
Supplement: s1 [file s1]

**Supplementary Table S1.** Comparison of the basic information of chloroplast genomes

| Species                        | <i>T. chinensis</i> | <i>T. delavayi</i> | <i>T. thibetensis</i> | <i>P. rigidula</i> | <i>Viscum minimum</i> | <i>Epifagus virginiana</i> | <i>Nicotiana tabacum</i> |
|--------------------------------|---------------------|--------------------|-----------------------|--------------------|-----------------------|----------------------------|--------------------------|
| Family                         | Loranthaceae        | Loranthaceae       | Loranthaceae          | Santalaceae        | Viscaceae             | Orobanchaceae              | Solanaceae               |
| Accession No.                  | OQ509064            | MH161426           | MH161427              | OQ509063           | KJ512176              | M81884                     | Z00044                   |
| Genome size(bp)                | 121,363             | 119,941            | 122,286               | 138,492            | 131,016               | 70,028                     | 155,844                  |
| LSC length(bp)                 | 70,358              | 70,281             | 70,018                | 79,584             | 75,814                | 19,799                     | 86,684                   |
| SSC length(bp)                 | 6,077               | 5,942              | 6,120                 | 10,652             | 9,014                 | 4,759                      | 18,482                   |
| IRa length(bp)                 | 22,464              | 21,859             | 23,074                | 24,128             | 23,094                | 22,735                     | 25,339                   |
| IRb length(bp)                 | 22,464              | 21,859             | 23,074                | 24,128             | 23,094                | 22,735                     | 25,339                   |
| GC content(%)                  | 37.3                | 37.1               | 37.2                  | 37.9               | 36.2                  | 37.5                       | 37.8                     |
| Number of genes                | 108                 | 108                | 112                   | 115                | 104                   | 53                         | 151                      |
| Number of protein-coding genes | 67                  | 68                 | 67                    | 71                 | 66                    | 10                         | 112                      |
| Number of tRNAs                | 33                  | 30                 | 34                    | 36                 | 29                    | 17                         | 30                       |
| Number of rRNAs                | 8                   | 8                  | 8                     | 8                  | 8                     | 8                          | 8                        |

**Supplementary Table S2.** Comparison of the gene composition in chloroplast genomes

| Genes                        | <i>T. chinensis</i> | <i>T. delavayi</i> | <i>T. thibetensis</i> | <i>P. rigidula</i> | <i>Viscum minimum</i> | <i>Epifagus virginiana</i> | <i>Nicotiana tabacum</i> |
|------------------------------|---------------------|--------------------|-----------------------|--------------------|-----------------------|----------------------------|--------------------------|
| <i>accD</i>                  | +                   | +                  | +                     | +                  | +                     | +                          | +                        |
| <i>atpA</i>                  | +                   | +                  | +                     | +                  | +                     | +                          | +                        |
| <i>atpB</i>                  | +                   | +                  | +                     | +                  | +                     | +                          | +                        |
| <i>atpE</i>                  | +                   | +                  | +                     | +                  | +                     | -                          | +                        |
| <i>atpF</i>                  | +                   | +                  | +                     | +                  | +                     | -                          | +                        |
| <i>atpH</i>                  | +                   | +                  | +                     | +                  | +                     | -                          | +                        |
| <i>atpI</i>                  | +                   | +                  | +                     | +                  | +                     | -                          | +                        |
| <i>ccsA</i> ( <i>ycf5</i> )  | +                   | +                  | +                     | +                  | +                     | -                          | +                        |
| <i>cemA</i> ( <i>ycf10</i> ) | +                   | +                  | +                     | +                  | +                     | -                          | +                        |
| <i>clpP</i>                  | +                   | +                  | +                     | +                  | +                     | +                          | +                        |
| <i>infA</i>                  | -                   | -                  | -                     | +                  | -                     | +                          | +                        |
| <i>matK</i>                  | +                   | +                  | +                     | +                  | +                     | +                          | +                        |
| <i>ndhA</i>                  | -                   | -                  | -                     | -                  | -                     | -                          | +                        |
| <i>ndhB</i>                  | -                   | -                  | -                     | +                  | +                     | +                          | +                        |
| <i>ndhC</i>                  | -                   | -                  | -                     | -                  | -                     | -                          | +                        |
| <i>ndhD</i>                  | -                   | -                  | -                     | -                  | -                     | -                          | +                        |
| <i>ndhE</i>                  | -                   | -                  | -                     | -                  | -                     | -                          | +                        |
| <i>ndhF</i>                  | -                   | -                  | -                     | -                  | -                     | -                          | +                        |
| <i>ndhG</i>                  | -                   | -                  | -                     | -                  | -                     | -                          | +                        |
| <i>ndhH</i>                  | -                   | -                  | -                     | -                  | -                     | -                          | +                        |
| <i>ndhI</i>                  | -                   | -                  | -                     | -                  | -                     | -                          | +                        |
| <i>ndhJ</i>                  | -                   | -                  | -                     | -                  | -                     | -                          | +                        |
| <i>ndhK</i>                  | -                   | -                  | -                     | -                  | -                     | -                          | +                        |
| <i>petA</i>                  | +                   | +                  | +                     | +                  | +                     | -                          | +                        |
| <i>petB</i>                  | +                   | +                  | +                     | +                  | +                     | -                          | +                        |
| <i>petD</i>                  | +                   | +                  | +                     | +                  | +                     | -                          | +                        |
| <i>petG</i>                  | +                   | +                  | +                     | +                  | +                     | -                          | +                        |
| <i>petL</i>                  | +                   | +                  | +                     | +                  | +                     | -                          | +                        |
| <i>petN</i>                  | +                   | +                  | +                     | +                  | +                     | -                          | -                        |
| <i>psaA</i>                  | +                   | +                  | +                     | +                  | +                     | -                          | +                        |
| <i>psaB</i>                  | +                   | +                  | +                     | +                  | +                     | -                          | +                        |
| <i>psaC</i>                  | +                   | +                  | +                     | +                  | +                     | -                          | +                        |
| <i>psaI</i>                  | +                   | +                  | +                     | +                  | +                     | -                          | +                        |
| <i>psaJ</i>                  | +                   | +                  | +                     | +                  | +                     | -                          | +                        |
| <i>psbA</i>                  | +                   | +                  | +                     | +                  | +                     | +                          | +                        |
| <i>psbB</i>                  | +                   | +                  | +                     | +                  | +                     | +                          | +                        |
| <i>psbC</i>                  | +                   | +                  | +                     | +                  | +                     | -                          | +                        |
| <i>psbD</i>                  | +                   | +                  | +                     | +                  | +                     | -                          | +                        |
| <i>psbE</i>                  | +                   | +                  | +                     | +                  | +                     | -                          | +                        |
| <i>psbF</i>                  | +                   | +                  | +                     | +                  | +                     | -                          | +                        |

|                             |   |   |   |   |   |   |   |
|-----------------------------|---|---|---|---|---|---|---|
| <i>psbH</i>                 | + | + | + | + | + | - | + |
| <i>psbI</i>                 | + | + | + | + | + | - | + |
| <i>psbJ</i>                 | + | + | + | + | + | - | + |
| <i>psbK</i>                 | + | + | + | + | + | - | + |
| <i>psbL</i>                 | + | + | + | + | + | - | + |
| <i>psbM</i>                 | + | + | + | + | + | - | + |
| <i>psbN</i>                 | + | + | + | + | + | - | + |
| <i>psbT</i>                 | + | + | + | + | + | - | + |
| <i>psbZ</i> ( <i>ycf9</i> ) | + | + | + | + | + | - | + |
| <i>rbcL</i>                 | + | + | + | + | + | + | + |
| <i>rpl12</i>                | - | - | - | - | - | + | - |
| <i>rpl14</i>                | + | + | + | + | + | + | + |
| <i>rpl16</i>                | + | + | + | + | + | + | + |
| <i>rpl2</i>                 | + | + | + | + | + | + | + |
| <i>rpl20</i>                | + | + | + | + | + | + | + |
| <i>rpl22</i>                | + | + | + | + | + | - | + |
| <i>rpl23</i>                | + | + | + | + | + | + | + |
| <i>rpl32</i>                | - | - | - | + | + | - | + |
| <i>rpl33</i>                | + | + | + | + | - | + | + |
| <i>rpl36</i>                | + | + | + | + | + | + | + |
| <i>rpoA</i>                 | + | + | + | + | + | + | + |
| <i>rpoB</i>                 | + | + | + | + | + | - | + |
| <i>rpoC1</i>                | + | + | + | + | + | - | + |
| <i>rpoC2</i>                | + | + | + | + | + | - | + |
| <i>rps11</i>                | + | + | + | + | + | + | + |
| <i>rps12</i>                | + | + | + | + | + | + | + |
| <i>rps14</i>                | + | + | + | + | + | + | + |
| <i>rps15</i>                | - | - | - | + | + | - | + |
| <i>rps16</i>                | - | - | - | + | + | - | + |
| <i>rps18</i>                | + | + | + | + | + | + | + |
| <i>rps19</i>                | + | + | + | + | + | + | + |
| <i>rps2</i>                 | + | + | + | + | + | + | + |
| <i>rps3</i>                 | + | + | + | + | + | + | + |
| <i>rps4</i>                 | + | + | + | + | + | + | + |
| <i>rps7</i>                 | + | + | + | + | + | + | + |
| <i>rps8</i>                 | + | + | + | + | + | + | + |
| <i>rrn16S</i>               | + | + | + | + | + | + | + |
| <i>rrn23S</i>               | + | + | + | + | + | + | + |
| <i>rrn4.5S</i>              | + | + | + | + | + | + | + |
| <i>rrn5S</i>                | + | + | + | + | + | + | + |
| <i>trnA</i> -UGC            | + | - | + | + | + | + | + |
| <i>trnC</i> -GCA            | + | + | + | + | + | + | + |
| <i>trnD</i> -GUC            | + | + | + | + | + | + | + |
| <i>trnE</i> -UUC            | + | + | + | + | + | + | + |

|                             |   |   |   |   |   |   |   |
|-----------------------------|---|---|---|---|---|---|---|
| <i>trnF-GAA</i>             | + | + | + | + | + | + | + |
| <i>trnJ<sup>M</sup>-CAU</i> | + | + | + | + | + | - | + |
| <i>trnG-GCC</i>             | + | + | + | + | + | - | + |
| <i>trnG-UCC</i>             | - | - | - | + | + | - | + |
| <i>trnH-GUG</i>             | - | + | + | + | + | + | + |
| <i>trnI-CAU</i>             | + | + | + | + | - | + | - |
| <i>trnI-GAU</i>             | + | - | + | + | + | + | + |
| <i>trnK-UUU</i>             | - | - | - | + | + | - | + |
| <i>trnL-CAA</i>             | + | + | + | + | + | + | + |
| <i>trnL-UAA</i>             | + | + | + | + | + | - | + |
| <i>trnL-UAG</i>             | + | + | + | + | + | + | + |
| <i>trnM-CAU</i>             | + | + | + | + | + | + | + |
| <i>trnN-GUU</i>             | + | + | + | + | + | + | + |
| <i>trnP-UGG</i>             | + | + | + | + | + | + | + |
| <i>trnQ-UUG</i>             | + | + | + | + | + | + | + |
| <i>trnR-ACG</i>             | + | + | + | + | + | + | + |
| <i>trnR-UCU</i>             | + | + | + | + | + | + | + |
| <i>trnS-GCU</i>             | + | + | + | + | + | + | + |
| <i>trnS-GGA</i>             | + | + | + | + | + | + | + |
| <i>trnS-UGA</i>             | + | + | + | + | + | + | + |
| <i>trnT-GGU</i>             | + | + | + | + | + | - | + |
| <i>trnT-UGU</i>             | + | + | + | + | + | - | + |
| <i>trnV-GAC</i>             | + | + | + | + | + | - | + |
| <i>trnV-UAC</i>             | - | - | - | - | - | - | + |
| <i>trnW-CCA</i>             | + | + | + | + | + | + | + |
| <i>trnY-GUA</i>             | + | + | + | + | + | + | + |
| <i>ycf1</i>                 | + | + | + | + | - | - | + |
| <i>ycf2</i>                 | + | + | + | + | + | + | + |
| <i>ycf3</i>                 | + | + | + | + | + | - | + |
| <i>ycf4</i>                 | + | + | + | + | + | - | + |
| <i>ycf15</i>                | + | - | - | - | - | - | + |

(+: present; -: missing)

**Supplementary Table S3.** Types and amounts of SSRs in the chloroplast genomes of *Taxillus* species

| SSR type | Repeat unit  | <i>T. chinensis</i> | <i>T. delavayi</i> | <i>T. levinei</i> | <i>T. liquidam baricola</i> | <i>T. lonicerifolius</i> | <i>T. matsudae</i> | <i>T. nigrans</i> | <i>T. pseudoc hinensis</i> | <i>T. rhodode ndricola</i> | <i>T. sutchu enensis</i> | <i>T. theifer</i> | <i>T. thibetensis</i> | <i>T. tsaii</i> | <i>T. vestitus</i> | <i>T. yadoriki</i> |
|----------|--------------|---------------------|--------------------|-------------------|-----------------------------|--------------------------|--------------------|-------------------|----------------------------|----------------------------|--------------------------|-------------------|-----------------------|-----------------|--------------------|--------------------|
| Mono     | A/T          | 45                  | 49                 | 32                | 40                          | 36                       | 37                 | 40                | 42                         | 36                         | 38                       | 41                | 55                    | 44              | 44                 | 36                 |
|          | C/G          | 3                   | 1                  | -                 | 4                           | -                        | 2                  | 1                 | 1                          | -                          | 1                        | 2                 | 1                     | 1               | 2                  | -                  |
|          | AC/GT        | -                   | -                  | -                 | -                           | -                        | -                  | -                 | -                          | -                          | -                        | 1                 | -                     | -               | -                  | -                  |
| Di       | AG/CT        | -                   | -                  | -                 | -                           | -                        | 2                  | -                 | -                          | -                          | -                        | -                 | 3                     | -               | -                  | -                  |
|          | AT/AT        | 6                   | 8                  | 5                 | 8                           | 5                        | 11                 | 12                | 11                         | 9                          | 10                       | 7                 | 18                    | 11              | 7                  | 4                  |
| Tri      | AAG/CTT      | 2                   | 2                  | 2                 | 2                           | 2                        | 2                  | 2                 | 2                          | 2                          | 2                        | 2                 | 2                     | 2               | 2                  | 2                  |
|          | AAT/ATT      | -                   | 3                  | -                 | 1                           | -                        | -                  | 2                 | 1                          | 1                          | 2                        | -                 | 1                     | 1               | 2                  | -                  |
|          | AAAAG/CTTT   | 1                   | 1                  | 2                 | 1                           | 2                        | -                  | -                 | -                          | -                          | -                        | -                 | 3                     | -               | -                  | 2                  |
|          | AAAT/ATTT    | -                   | -                  | 1                 | 2                           | -                        | 1                  | -                 | -                          | -                          | -                        | -                 | 1                     | -               | -                  | 2                  |
|          | AAGG/CCTT    | -                   | -                  | -                 | 1                           | -                        | -                  | -                 | -                          | -                          | -                        | -                 | -                     | -               | -                  | -                  |
| Tetra    | AAGT/ACTT    | -                   | -                  | 1                 | 1                           | 1                        | -                  | 1                 | 1                          | 1                          | 1                        | -                 | -                     | 1               | 1                  | -                  |
|          | AATC/ATTG    | 1                   | -                  | -                 | -                           | -                        | -                  | -                 | -                          | -                          | -                        | -                 | -                     | -               | -                  | -                  |
|          | AATG/ATTC    | -                   | -                  | -                 | -                           | -                        | -                  | -                 | -                          | -                          | -                        | -                 | -                     | 2               | -                  | -                  |
|          | AATT/AATT    | -                   | -                  | 1                 | 1                           | 1                        | 1                  | 1                 | 1                          | 1                          | -                        | 1                 | -                     | 1               | 3                  | -                  |
|          | ACAG/CTGT    | 1                   | 1                  | 1                 | 1                           | 1                        | 1                  | 1                 | 1                          | 1                          | 1                        | 1                 | -                     | 1               | 1                  | 1                  |
|          | ACAT/ATGT    | -                   | -                  | -                 | -                           | -                        | -                  | -                 | 1                          | 1                          | -                        | -                 | -                     | 1               | -                  | -                  |
|          | AGAT/ATCT    | -                   | -                  | -                 | -                           | 2                        | -                  | -                 | -                          | -                          | -                        | -                 | -                     | -               | 2                  | 2                  |
|          | AGGG/CCCT    | -                   | 2                  | -                 | -                           | -                        | -                  | -                 | -                          | -                          | -                        | -                 | 2                     | -               | -                  | -                  |
|          | AAAAAT/ATTTT | -                   | 1                  | -                 | -                           | -                        | -                  | -                 | -                          | -                          | -                        | -                 | -                     | -               | -                  | -                  |
|          | AATAT/ATATT  | 1                   | -                  | -                 | -                           | -                        | 1                  | 1                 | 1                          | 1                          | 1                        | -                 | -                     | 1               | 1                  | -                  |
| Penta    | ACTAT/AGTAT  | -                   | -                  | -                 | -                           | -                        | -                  | -                 | -                          | -                          | -                        | -                 | -                     | -               | 1                  | -                  |
|          | ATATC/ATATG  | -                   | -                  | -                 | -                           | -                        | -                  | -                 | -                          | -                          | -                        | -                 | 1                     | -               | -                  | -                  |

**Supplementary Table S4.** Types and amounts of SSRs in the chloroplast genomes of *Phacellaria* species

| SSR type | Repeat unit   | <i>P. rigidula</i> | <i>P. compressa</i> | <i>P. glomerata</i> |
|----------|---------------|--------------------|---------------------|---------------------|
| Mono     | A/T           | 31                 | 28                  | 30                  |
|          | C/G           | 1                  | 1                   | 1                   |
| Di       | AG/CT         | 2                  | 2                   | 2                   |
|          | AT/AT         | 2                  | 4                   | 4                   |
| Tri      | AAT/ATT       | 2                  | 2                   | 2                   |
|          | AAC/GTT       | -                  | 1                   |                     |
|          | AAAT/ATTT     | -                  | 1                   | 2                   |
| Tetra    | AATC/ATTG     | 2                  | -                   | -                   |
|          | ACAG/CTGT     | 1                  | 1                   | 1                   |
| Penta    | ACTAT/AGTAT   | 1                  | -                   | -                   |
| Hexa     | AATGAT/ATCATT | 1                  | -                   | -                   |

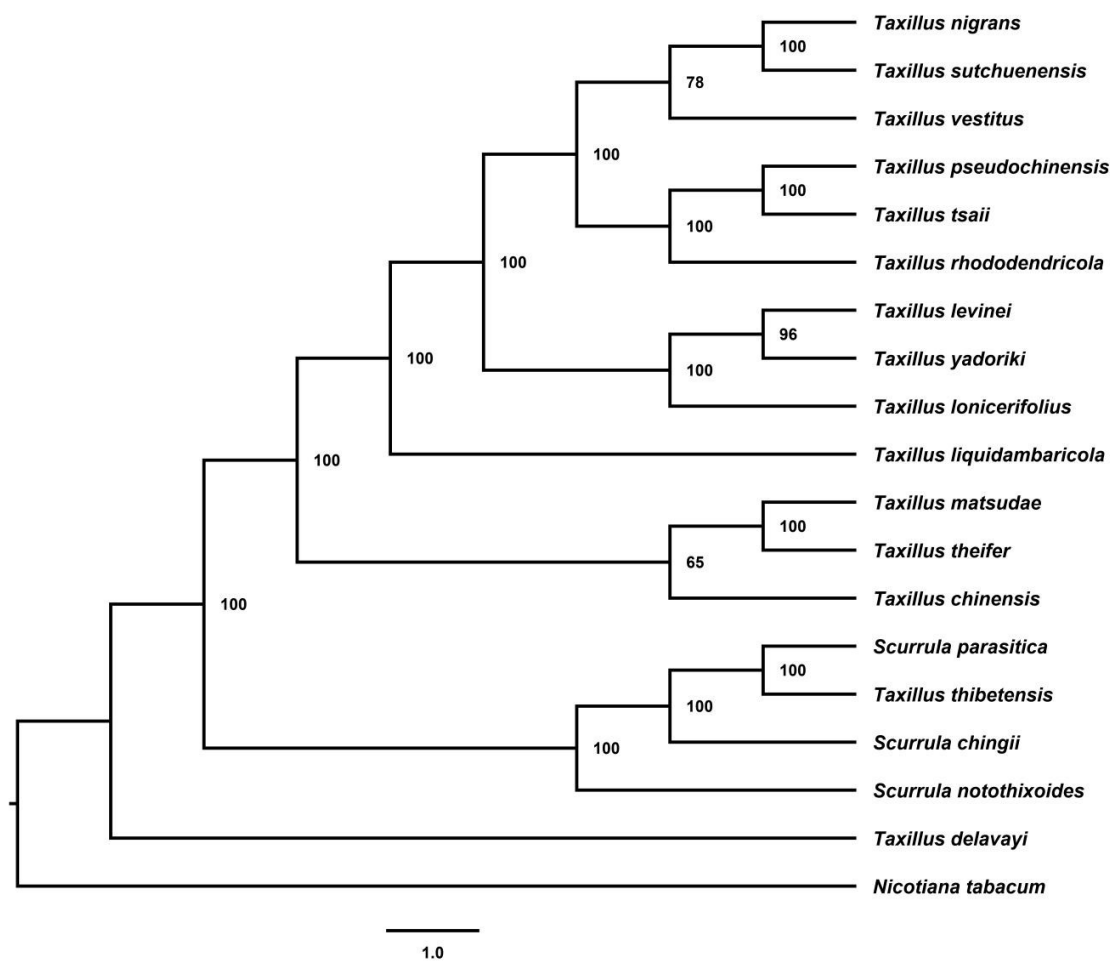

**Supplementary Figure S1.** Phylogenetic tree constructed using Maximum Likelihood (ML) method based on common protein-coding genes of *Taxillus* and *Scurrula* species. Numbers at nodes are values for bootstrap support.

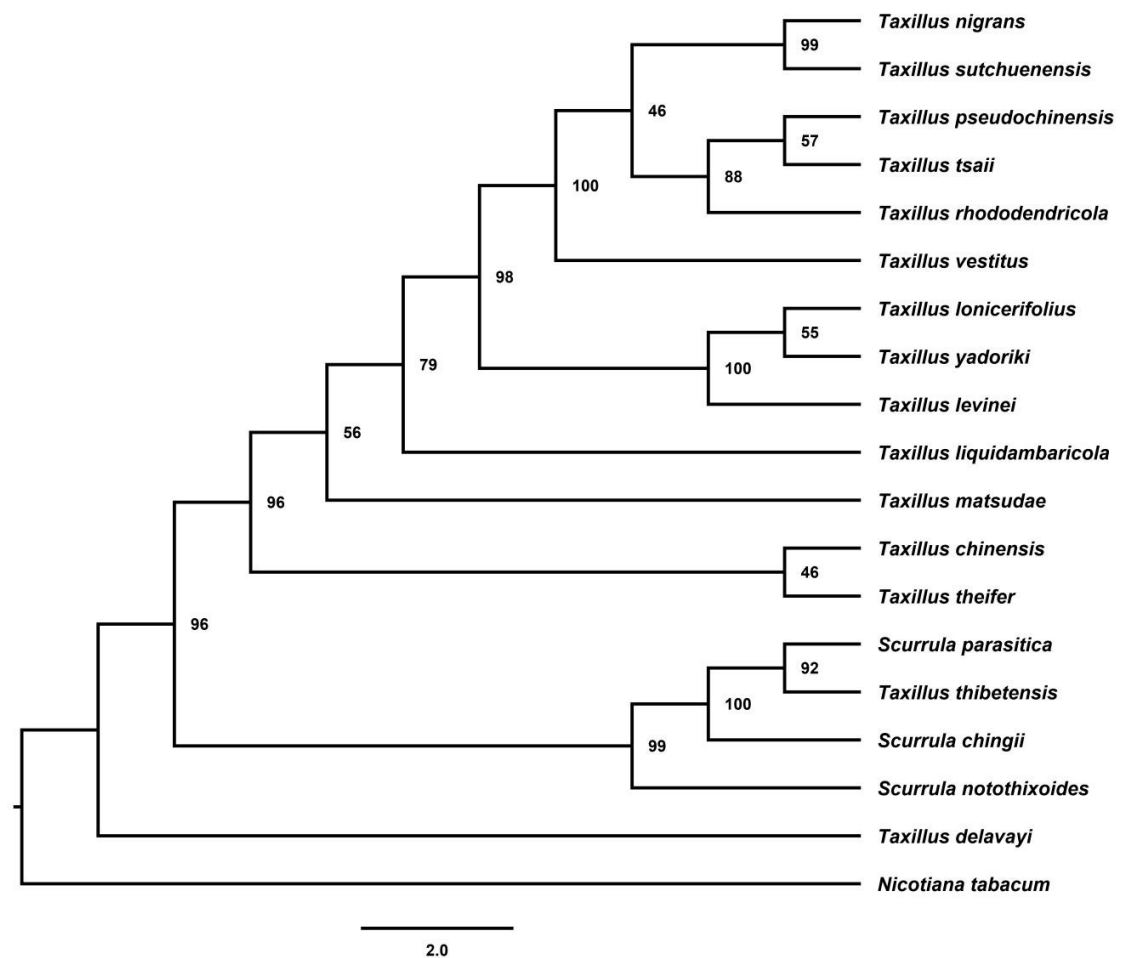

**Supplementary Figure S2.** Phylogenetic tree constructed using ML method based on *matK* genes of *Taxillus* and *Scurrula* species. Numbers at nodes are values for bootstrap support.



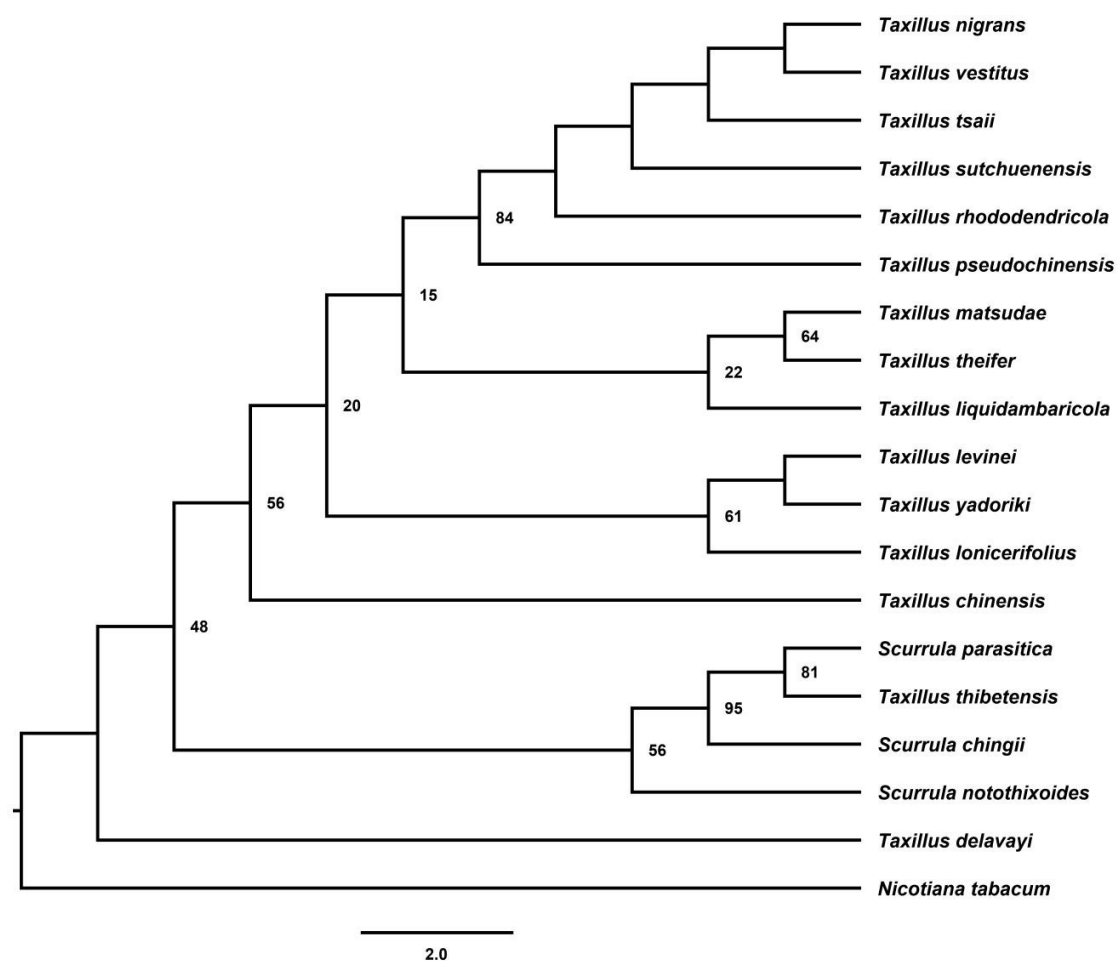

**Supplementary Figure S3.** Phylogenetic tree constructed using ML method based on *rbcL* genes of *Taxillus* and *Scurrula* species. Numbers at nodes are values for bootstrap support.
